# Supplementary material for: Bariatric surgery emphasizes biological sex differences in rodent hepatic lipid handling
Source: PubMed Central journal article supplement (PMC5273842; doi:10.1186/s13293-017-0126-x), 2017-01-28
Supplement: 13293_2017_126_MOESM1_ESM.pdf [file 13293_2017_126_MOESM1_ESM.pdf]

# Figure S1

## A

### Genes Up/Down Between Female VSG vs Sham

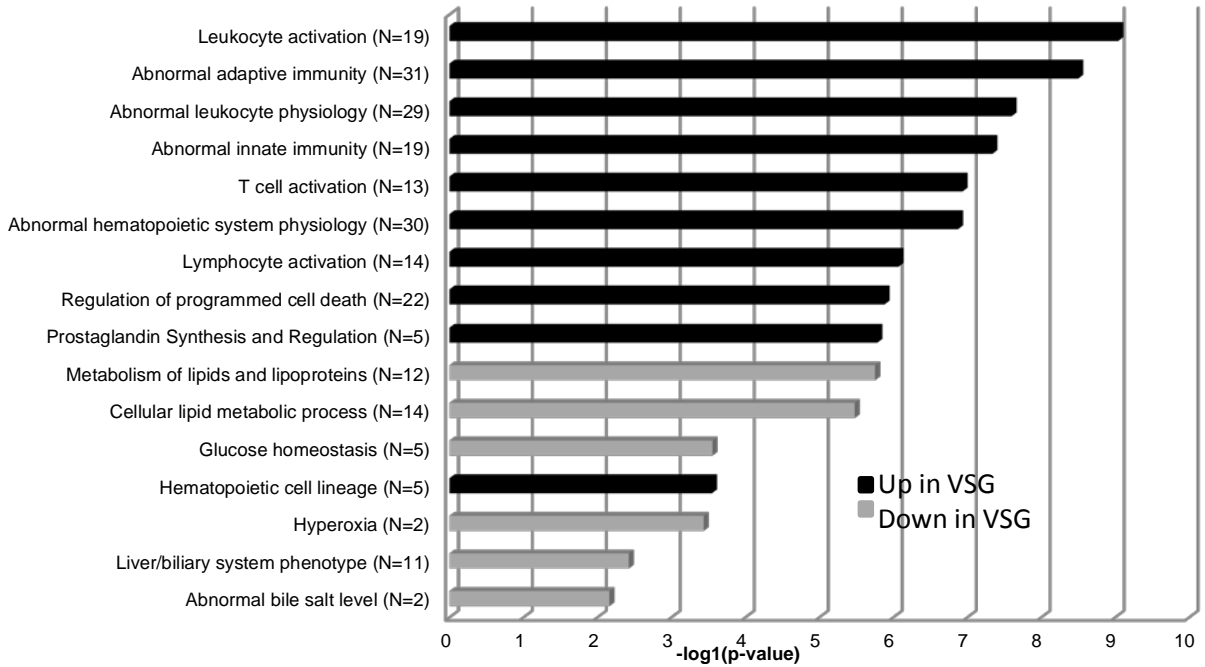

## B

| Effect | Enriched Ontology                               | Gene List                                                                                                                                                                                                    |
|--------|-------------------------------------------------|--------------------------------------------------------------------------------------------------------------------------------------------------------------------------------------------------------------|
| Up     | Leukocyte activation (N=19)                     | FCER1G, ANXA3, IL1B, IL7, TLR1, FCGR3A, GADD45G, IGFBP2, BCL2A1, FAS, PLSR1, SOX4, CD300A, PRKCB, AIF1, EGR1, PTPRC, NHEJ1, CD74                                                                             |
| Up     | Abnormal adaptive immunity (N=31)               | FCER1G, GZMA, SLPI, IL1B, PTGER3, IL7, TLR1, GADD45G, CYBB, PLAC8, BCL2A1, TLR8, FAS, IGJ, ABCG1, NEDD9, CD300A, PLA2G4A, EMR1, RAC2, PRKCB, ITGA6, MST1, FADS2, CSF1R, EGR1, PTPRC, NHEJ1, LY86, CD74, GBP2 |
| Up     | Abnormal leukocyte physiology (N=29)            | FCER1G, GZMA, SLPI, IL1B, IL7, TLR1, GADD45G, CYBB, PLAC8, BCL2A1, TLR8, FAS, IGJ, ABCG1, NEDD9, CD300A, PLA2G4A, EMR1, RAC2, PRKCB, ITGA6, MST1, FADS2, EGR1, PTPRC, NHEJ1, LY86, CD74, GBP2                |
| Up     | Abnormal innate immunity (N=19)                 | FCER1G, SLPI, IL1B, TLR1, GADD45G, CYBB, PLAC8, BCL2A1, FAS, IGJ, ABCG1, PLA2G4A, EMR1, RAC2, MST1, FADS2, EGR1, PTPRC, GBP2                                                                                 |
| Up     | T cell activation (N=13)                        | IL1B, IL7, FCGR3A, GADD45G, IGFBP2, BCL2A1, FAS, SOX4, AIF1, EGR1, PTPRC, NHEJ1, CD74                                                                                                                        |
| Up     | Abnormal hematopoietic system physiology (N=30) | FCER1G, GZMA, SLPI, IL1B, PTGS1, IL7, TLR1, GADD45G, CYBB, PLAC8, BCL2A1, TLR8, FAS, IGJ, ABCG1, NEDD9, CD300A, PLA2G4A, EMR1, RAC2, PRKCB, ITGA6, MST1, FADS2, EGR1, PTPRC, NHEJ1, LY86, CD74, GBP2         |
| Up     | Lymphocyte activation (N=14)                    | IL1B, IL7, FCGR3A, GADD45G, IGFBP2, BCL2A1, FAS, SOX4, PRKCB, AIF1, EGR1, PTPRC, NHEJ1, CD74                                                                                                                 |
| Up     | Regulation of programmed cell death (N=22)      | FCER1G, GZMA, DAP, IL1B, HSPB1, IL7, FRZB, PDK4, PLAC8, BCL2A1, RTN4, FAS, PLSR1, SOX4, PLA2G4A, ITGA6, AIF1, BEX2, EGR1, PTPRC, PPP2R2B, CD74                                                               |
| Up     | Prostaglandin Synthesis and Regulation (N=5)    | HSD11B1, ANXA3, PTGS1, PTGER3, PLA2G4A                                                                                                                                                                       |
| Down   | Metabolism of lipids and lipoproteins (N=12)    | HMGCGR, FASN, IDI1, ABCG5, PTGIS, PNPLA3, SQLE, CYP7A1, MVD, PIK3R1, ELOVL6, FADS3                                                                                                                           |
| Down   | Cellular lipid metabolic process (N=14)         | ACSM2A, HMGCGR, FASN, IDI1, HAO2, PTGIS, PNPLA3, CYP7A1, MVD, PIK3R1, PCSK9, ELOVL6, GATA6, FADS3                                                                                                            |
| Down   | Glucose homeostasis (N=5)                       | ACSM2A, HMGCGR, CYP7A1, GCK, SYBU                                                                                                                                                                            |
| Up     | Hematopoietic cell lineage (N=5)                | IL1B, IL7, ITGA6, CSF1R, TFRC                                                                                                                                                                                |
| Down   | Hyperoxia (N=2)                                 | HBB, HBA1                                                                                                                                                                                                    |
| Down   | Liver/biliary system phenotype (N=11)           | ABCG5, MFSD2A, CYP7A1, HBB, PIK3R1, CCRN4L, GCK, PCSK9, BCKDK, GATA6, BCL6                                                                                                                                   |
| Down   | Abnormal bile salt level (N=2)                  | CYP7A1, PCSK9                                                                                                                                                                                                |
